# Supplementary material for: Inflammatory and Hypercoagulable Biomarkers and Clinical Outcomes in COVID-19 Patients
Source: MDPI journal article supplement (doi:10.3390/jcm10143086), 2021-07-13
Supplement: s1 [file s1]

## **Supplemental material**

**Number of Supplemental Table: 6 Tables**

**Number of Supplemental Figure: 3 Figures**

**Table S1A. Assays and Manufactures for C-Reactive Protein Measurements**

| Assays              | Manufactures                                                                                                                                             |
|---------------------|----------------------------------------------------------------------------------------------------------------------------------------------------------|
| Latex agglutination | EIKEN CHEMICAL CO.,LTD.<br>SEKISUI MEDICAL CO., LTD.<br>NITTOBO MEDICAL CO.,LTD.<br>FUJIFILM Wako Pure Chemical Corporation<br>LSI Medience Corporation. |
| Latex turbidimetry  | Shino-Test Corporation.<br>LSI Medience Corporation.<br>Roche Diagnostics K.K.                                                                           |

**Table S1B. Assays and Manufactures D-dimer Measurements**

| Assays              | Manufactures                                                                                                                                                                                                     |
|---------------------|------------------------------------------------------------------------------------------------------------------------------------------------------------------------------------------------------------------|
| Latex agglutination | LSI Medience Corporation.<br>bioMérieux Japan Ltd.<br>Roche Diagnostics K.K.                                                                                                                                     |
| Latex turbidimetry  | LSI Medience Corporation.<br>bioMérieux Japan Ltd.<br>Roche Diagnostics K.K.<br>Sysmex Corporation.<br>SEKISUI MEDICAL CO., LTD.<br>KAINOS Laboratories, Inc.<br><br>KYOKUTO PHARMACEUTICAL INDUSTRIAL CO., LTD. |

**Table S2. Univariate cox proportional hazard analysis for predictor of in-hospital mortality**

| Variables                        | HR    | CI   |         | p      |
|----------------------------------|-------|------|---------|--------|
| Demographics and medical history |       |      |         |        |
| Age                              | 1.05  | 1.03 | 1.07    | <0.001 |
| Male                             | 1.48  | 0.88 | 2.47    | 0.136  |
| Japanese                         | 21.10 | 0.06 | 7995.92 | 0.314  |
| BMI                              | 1.00  | 0.94 | 1.05    | 0.885  |
| Comorbidities                    |       |      |         |        |
| Hypertension                     | 1.16  | 0.70 | 1.92    | 0.571  |
| Diabetes mellitus                | 0.81  | 0.51 | 1.30    | 0.388  |
| Dyslipidemia                     | 0.73  | 0.45 | 1.18    | 0.198  |
| Heart failure                    | 1.59  | 0.85 | 2.94    | 0.145  |
| Coronary artery disease          | 2.41  | 1.36 | 4.24    | 0.002  |
| Myocardial infarction            | 1.58  | 0.72 | 3.46    | 0.252  |
| CI/TIA                           | 0.96  | 0.47 | 1.95    | 0.913  |
| Chronic lung disease             | 3.11  | 1.63 | 5.91    | 0.001  |
| CKD                              | 1.73  | 0.93 | 3.21    | 0.084  |
| Cancer                           | 2.53  | 1.41 | 4.56    | 0.002  |
| Symptoms                         |       |      |         |        |
| Fever (> 38.0°C)                 | 1.67  | 0.95 | 2.92    | 0.076  |
| Cough                            | 1.10  | 0.70 | 1.74    | 0.668  |
| Pharyngitis                      | 0.48  | 0.17 | 1.34    | 0.160  |
| Rhinorrhea                       | 0.86  | 0.26 | 2.84    | 0.801  |
| Dyspnea                          | 1.50  | 0.95 | 2.36    | 0.080  |
| Arthritis                        | 1.16  | 0.37 | 3.70    | 0.798  |
| Headache                         | 0.05  | 0.00 | 2.82    | 0.142  |
| Olfactory dysfunction            | 0.05  | 0.00 | 4.02    | 0.176  |
| Asymptom                         | 0.56  | 0.18 | 1.79    | 0.330  |
| Physical findings                |       |      |         |        |
| Max body temperature             | 1.38  | 1.04 | 1.84    | 0.027  |
| Herat rate                       | 1.02  | 1.00 | 1.03    | 0.017  |
| Systolic BP                      | 0.99  | 0.99 | 1.00    | 0.249  |
| Respiratory rate                 | 1.06  | 1.02 | 1.11    | 0.002  |
| SpO2                             | 0.95  | 0.92 | 0.98    | 0.003  |
| Laboratory data at admission     |       |      |         |        |
| White blood cell                 | 1.00  | 1.00 | 1.00    | 0.050  |
| Lymphocyte                       | 0.96  | 0.94 | 0.99    | 0.015  |

|                                        |      |      |      |        |
|----------------------------------------|------|------|------|--------|
| Neutrocyte                             | 1.03 | 1.01 | 1.05 | 0.019  |
| Eosinocyte                             | 0.70 | 0.50 | 0.98 | 0.038  |
| Hemoglobin                             | 0.92 | 0.83 | 1.02 | 0.096  |
| Platelet                               | 0.95 | 0.91 | 0.98 | 0.001  |
| Creatinin                              | 1.14 | 1.04 | 1.24 | 0.003  |
| eGFR                                   | 0.99 | 0.98 | 1.00 | 0.002  |
| LDH                                    | 1.00 | 1.00 | 1.00 | <0.001 |
| HbA1c                                  | 0.80 | 0.60 | 1.07 | 0.137  |
| CK                                     | 1.00 | 1.00 | 1.00 | 0.689  |
| Serum Alb                              | 0.51 | 0.36 | 0.73 | <0.001 |
| Specific biomarker at admission        |      |      |      |        |
| CRP                                    | 1.03 | 1.00 | 1.05 | 0.029  |
| D-dimer                                | 1.00 | 1.00 | 1.01 | 0.341  |
| FDP                                    | 1.00 | 1.00 | 1.00 | 0.989  |
| Ferritin                               | 1.00 | 1.00 | 1.00 | 0.602  |
| Procalcitonin                          | 1.00 | 0.98 | 1.03 | 0.725  |
| IL-6                                   | 1.00 | 0.99 | 1.01 | 0.944  |
| KL-6                                   | 1.00 | 1.00 | 1.00 | 0.001  |
| Both CRP and D-dimer were above Middle | 3.46 | 1.72 | 6.96 | <0.001 |

Data are shown as mean  $\pm$  standard deviation or median with interquartile range or percentage. Variables of laboratory

data were analyzed as continuous variables, except for cumulative variable of CRP and D-dimer. BMI: body mass

index, CI: cerebral infarction, TIA: transient ischemic attack, COPD: chronic obstructive pulmonary disease, CKD:

chronic kidney disease, BP: blood pressure, eGFR: estimated glomerular filtration rate, LDH: lactic acid

dehydrogenase, HbA1c: hemoglobin A1c, CK: creatine kinase, Alb: albumin, CRP: C-reactive protein, FDP: fibrin

degradation products, KL-6: Krebs von den Lungen-6 antigen.

**Table S3. Multivariate cox proportional hazard analysis for predictor of in-hospital mortality**

| Variables                              | HR   | CI    | p      |       |
|----------------------------------------|------|-------|--------|-------|
| Demographics and medical history       |      |       |        |       |
| Age                                    | 1.07 | 1.023 | 1.111  | 0.003 |
| Coronary artery disease                | 3.39 | 1.358 | 8.445  | 0.009 |
| COPD                                   | 1.18 | 0.353 | 3.917  | 0.793 |
| CKD                                    | 1.92 | 0.592 | 6.195  | 0.278 |
| Cancer                                 | 0.66 | 0.213 | 2.042  | 0.470 |
| Dyspnea                                | 0.85 | 0.360 | 1.989  | 0.702 |
| Max body temperature                   | 1.56 | 0.980 | 2.472  | 0.061 |
| Heart rate                             | 1.02 | 0.993 | 1.039  | 0.183 |
| SpO2                                   | 0.96 | 0.899 | 1.034  | 0.303 |
| White blood cell                       | 1.00 | 1.000 | 1.000  | 0.944 |
| Hemoglobin                             | 1.04 | 0.829 | 1.299  | 0.748 |
| Platelet                               | 0.92 | 0.857 | 0.992  | 0.030 |
| LDH                                    | 1.00 | 0.998 | 1.004  | 0.521 |
| Serum Alb                              | 0.83 | 0.315 | 2.189  | 0.706 |
| KL-6                                   | 1.00 | 1.000 | 1.002  | 0.181 |
| Both CRP and D-dimer were above Middle | 3.88 | 1.185 | 12.728 | 0.025 |

The Cox proportional hazard model predicting the odds of in-hospital mortality, adjusted for demographics and clinical comorbidities. Variables of laboratory data were analyzed as continuous variables, except for cumulative variable of CRP and D-dimer. Covariates included in the multivariable were selected based on univariate analyses.

HR: hazard ratio, CI: confidence interval, BMI: body mass index, COPD: chronic obstructive pulmonary disease,

CKD: chronic kidney disease, LDH: lactic acid dehydrogenase, Alb: albumin, KL-6: Krebs von den Lungen-6 antigen,

CRP: C-reactive protein.

**Table S4. Biomarker levels at each timing of admission, peak, and final examination**

|               | In-hospital death<br>( <i>n</i> =108) | <i>n</i> | Non in-hospital death<br>( <i>n</i> =585) | <i>n</i> | <i>P</i> Value |
|---------------|---------------------------------------|----------|-------------------------------------------|----------|----------------|
| CRP, mg/L     |                                       |          |                                           |          |                |
| At admission  | 107.2 (56.9 – 168.9)                  | 108      | 49.6 (13.4 – 104.5)                       | 559      | <0.001         |
| Peak          | 247.6 (153.3 – 326.7)                 | 104      | 816.2 (301.5 – 1524.3)                    | 544      | <0.001         |
| Final         | 156.0 (748.5 – 2374.5)                | 92       | 4.7 (1.4 – 17.5)                          | 484      | <0.001         |
| D-dimer, mg/L |                                       |          |                                           |          |                |
| At admission  | 2.15 (1.32 - 5.08)                    | 76       | 1.30 (0.70 - 2.60)                        | 385      | <0.001         |
| Peak          | 14.1 (3.7 - 51.9)                     | 82       | 2.40 (1.00 - 7.12)                        | 403      | <0.001         |
| Final         | 14.2 (5.93 - 36.1)                    | 58       | 1.90 (1.01 - 4.00)                        | 239      | <0.001         |

CRP: C-reactive protein.

**Table S5. The increment of biomarker values between baseline and peak**

|                      | In-hospital death<br>( <i>n</i> =108) | <i>n</i> | Non in-hospital death<br>( <i>n</i> =585) | <i>n</i> | <i>P</i> Value |
|----------------------|---------------------------------------|----------|-------------------------------------------|----------|----------------|
| CRP, mg/L            | 117.1 (15.1 – 209.2)                  | 104      | 0.15 (0.00 – 52.3)                        | 544      | <0.001         |
| D-dimer, mg/L        | 6.05 (0.00 - 31.1)                    | 74       | 0.00 (0.00 - 2.69)                        | 376      | <0.001         |
| FDP, µg/mL           | 1.3 (0.00 - 50.0)                     | 50       | 0.00 (0.00 - 2.90)                        | 158      | 0.004          |
| Ferritin, ng/mL      | 29.5 (0.00 - 750.0)                   | 40       | 0.00 (0.00 - 15.0)                        | 271      | 0.001          |
| Procalcitonin, ng/mL | 0.22 (0.00 - 2.14)                    | 52       | 0.00 (0.00 - 0.00)                        | 205      | <0.001         |
| KL6, U/mL            | 0.00 (0.00 - 269.0)                   | 46       | 0.00 (0.00 - 0.00)                        | 240      | 0.002          |

CRP: C-reactive protein, FDP: fibrin degradation products, KL-6: Krebs von den Lungen-6 antigen.

**Table S6. Timing of peak value of each biomarker (Days from discharge)**

|               | In-hospital death<br>( <i>n</i> =108) | <i>n</i> | Non in-hospital death<br>( <i>n</i> =585) | <i>n</i> | <i>P</i> Value |
|---------------|---------------------------------------|----------|-------------------------------------------|----------|----------------|
| CRP           | 4.5 (0.25 - 14.0)                     | 104      | 15.0 (9.0 - 24.0)                         | 546      | <0.001         |
| D-dimer       | 5.0 (1.0 - 13.0)                      | 82       | 13.5 (8.0 - 23.8)                         | 404      | <0.001         |
| FDP           | 8.0 (1.0 - 22.0 )                     | 59       | 16.0 (9.0 - 28.0)                         | 179      | 0.001          |
| Ferritin      | 7.0 (1.0 - 19.0)                      | 49       | 15.0 (9.8 - 25.3)                         | 302      | <0.001         |
| Procalcitonin | 8.0 (2.0 - 23.0 )                     | 55       | 17.0 (11.0 - 24.0)                        | 222      | 0.001          |
| KL6           | 8.5 (5.3 - 18.8)                      | 48       | 14.0 (8.0 - 25.0)                         | 267      | 0.012          |

CRP: C-reactive protein, FDP: fibrin degradation products, KL-6: Krebs von den Lungen-6 antigen.



## Supplemental Figure

### Figure S1

(A)

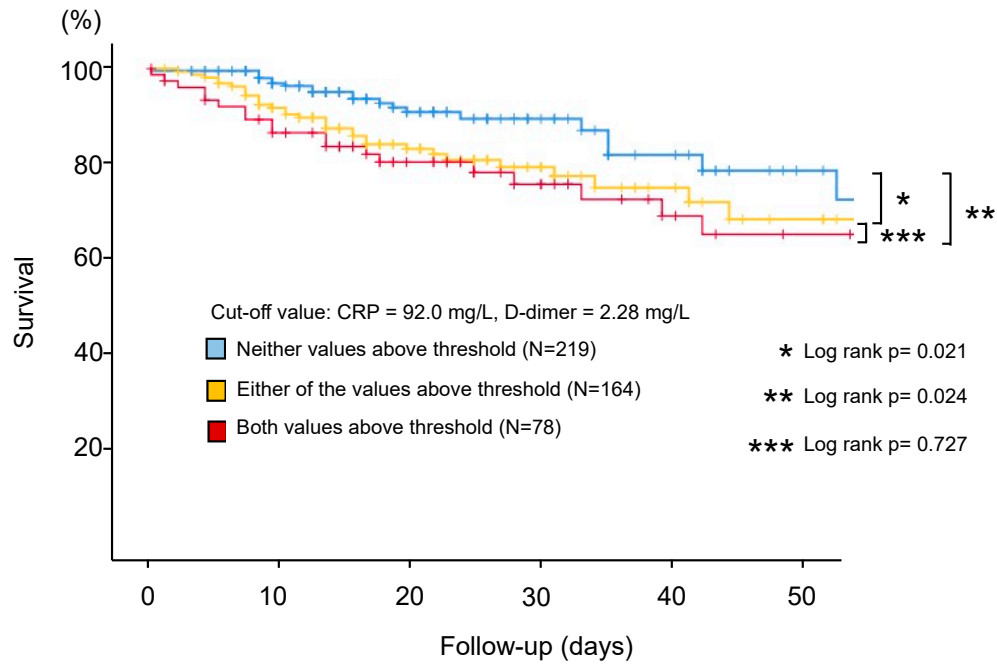

(B)

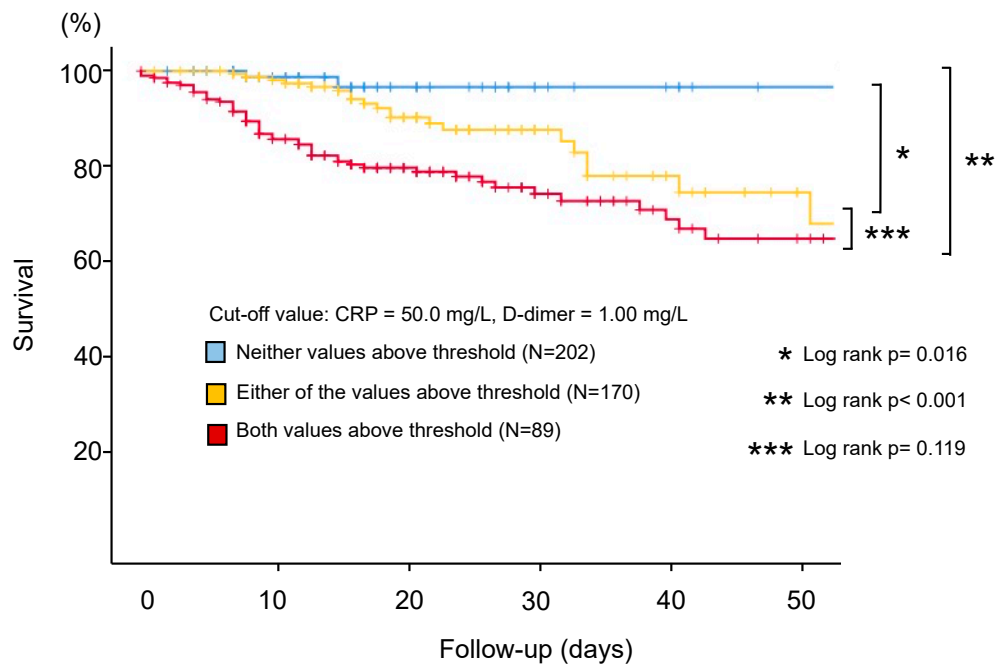

**Figure S2**

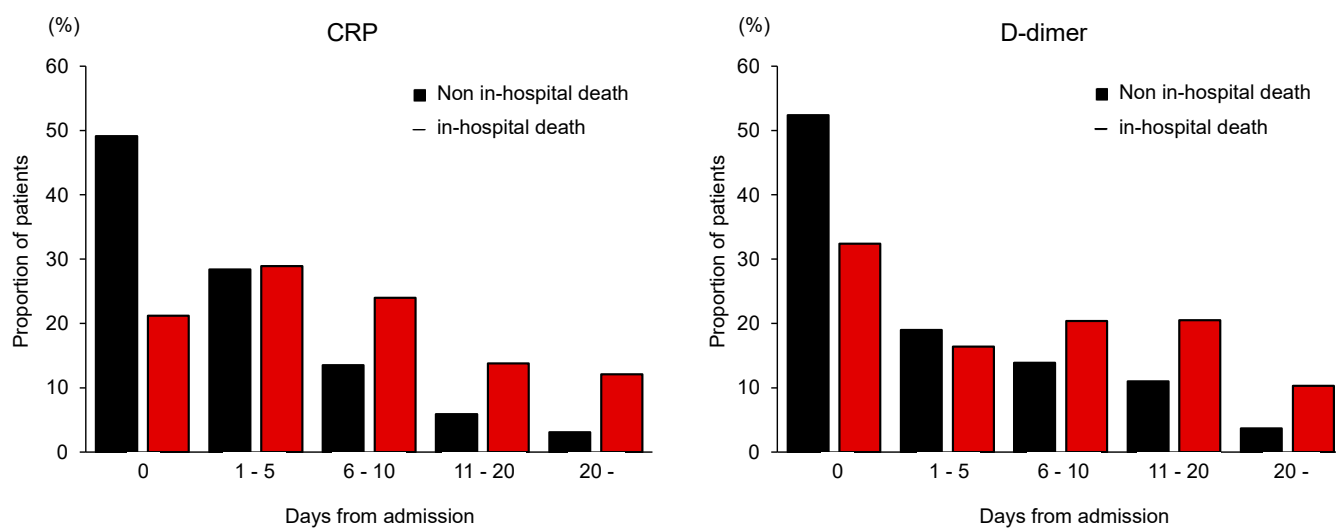

# Figure S3

(A)

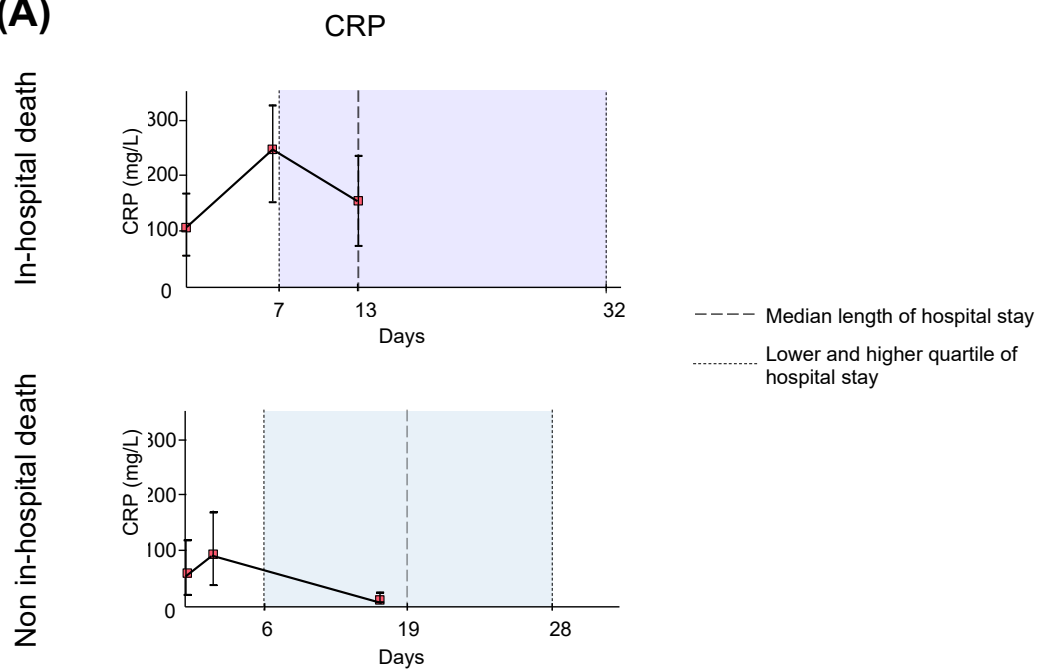

(B)

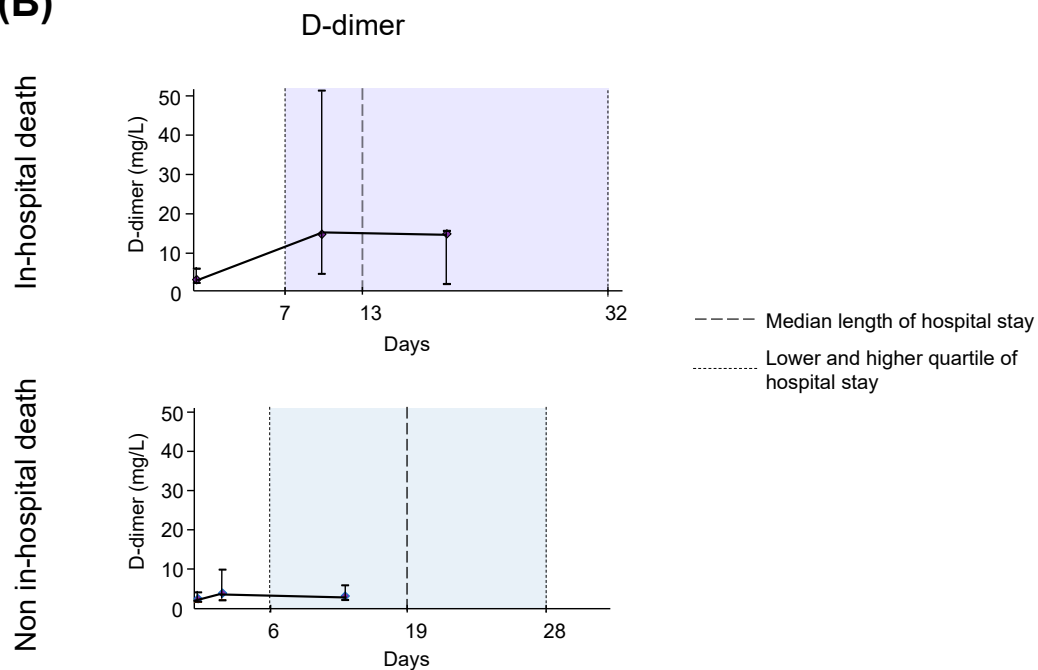

(C)

In-hospital death

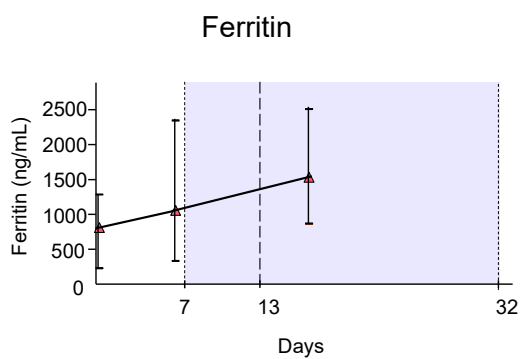

Non in-hospital death

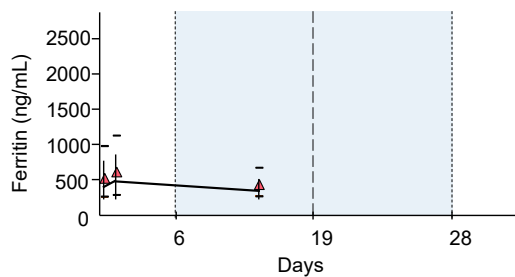

(D)

In-hospital death

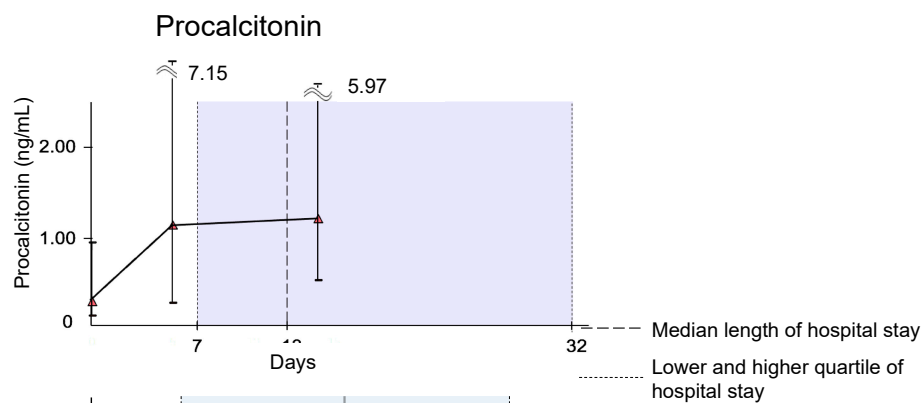

Non in-hospital death

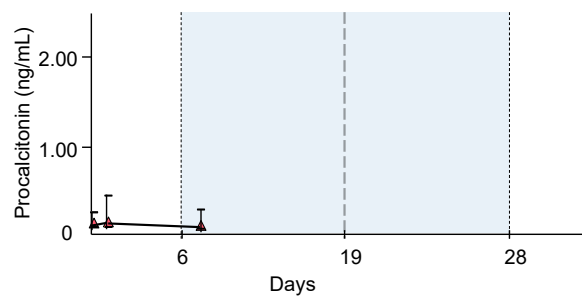

(E)

In-hospital death

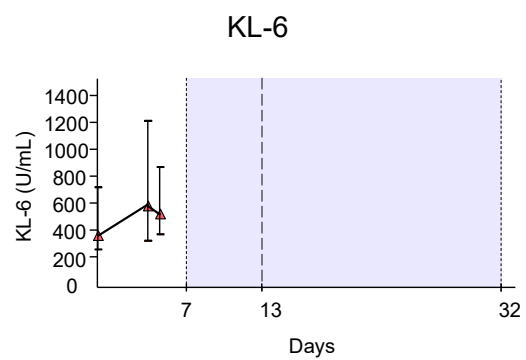

--- Median length of hospital stay  
..... Lower and higher quartile of hospital stay

Non in-hospital death

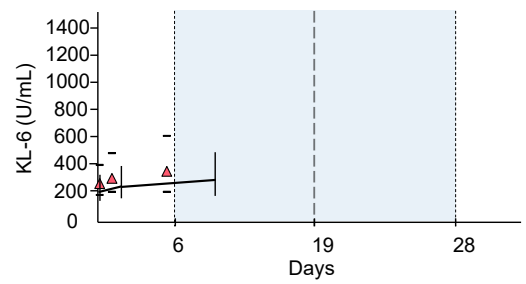

### **Supplemental Figure Legend**

Figure S1: Sensitivity analysis with additional threshold values to evaluate the incidence of in-hospital death. Threshold values were: (A) CRP, 92.0 mg/L; D-dimer, 2.28 mg/L, and (B) CRP, 50.0 mg/L; D-dimer, 1.00 mg/L. CRP: C-reactive protein. CRP: C-reactive protein.

Figure S2: Proportion of patients whose peak CRP and D-dimer values were recorded at the indicated time points (days from admission). CRP: C-reactive protein.

Figure S3: Trajectories of other biomarkers over time among survival and in-hospital deaths. (A) CRP, (B) D-dimer, (C) ferritin, (D) procalcitonin, and (E) KL-6. CRP: C-reactive protein.
